# Supplementary material
Source: Springer Nature journal article supplement (https://www.springermedizin.de/resource/supplementary/12890_2010_269_MOESM25_ESM.pdf/9504838)

REF SEX

Relative Risk  
95% CIWeight  
(%)Relative Risk  
95% CI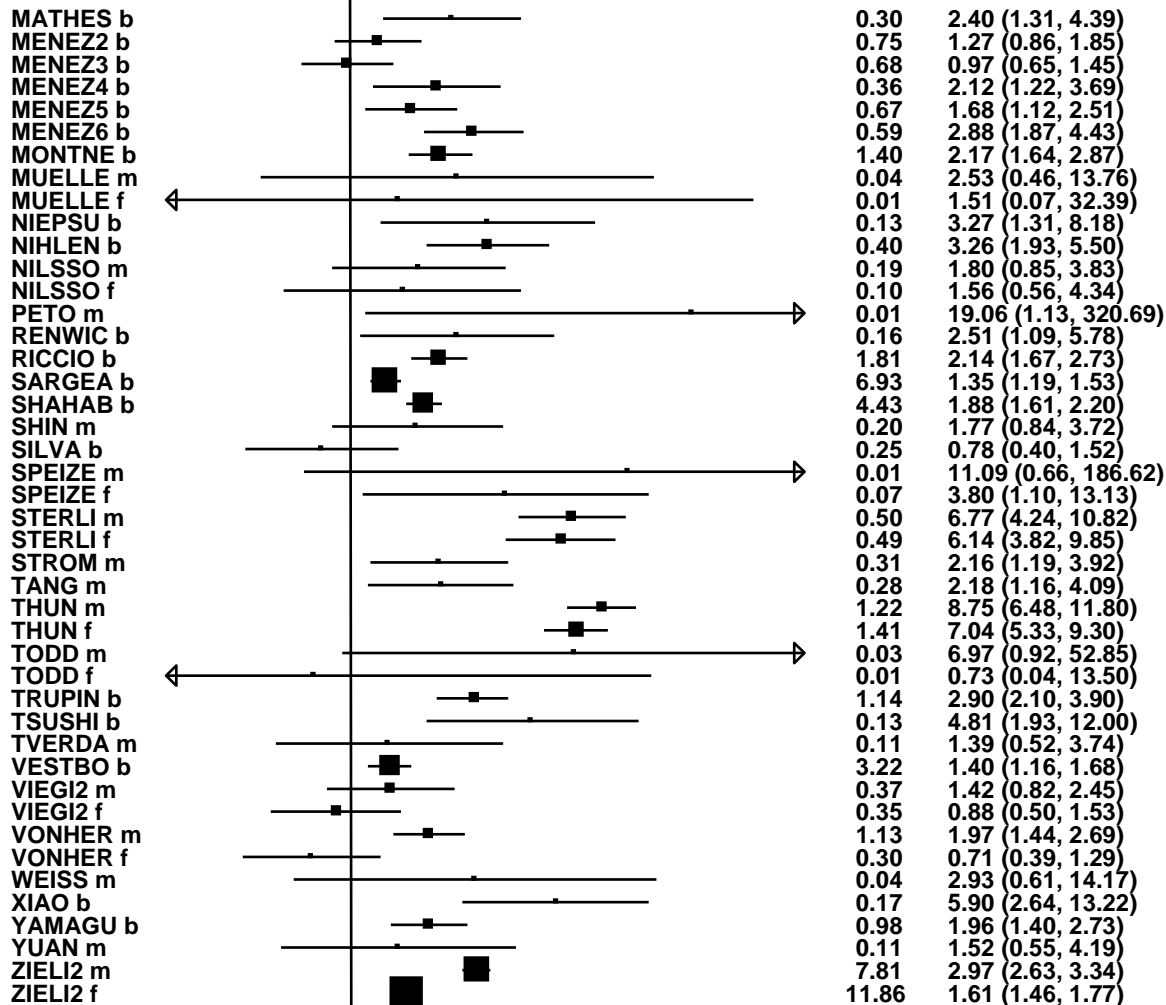

Total (95% CI)

100.00

2.35 (2.11, 2.63)

0.2 0.4 1 2 5 10 25 50

Supplement: MOESM25 [file 9504838]
